# Supplementary material
Source: PubMed Central journal article supplement (PMC3733989)
Supplement: NIHMS493852-supplement-Supporting_Information.pdf [file NIHMS493852-supplement-Supporting_Information.pdf]

*Supporting Information for:*

**Fragmentation of a Linoleate-derived  $\gamma$ -Hydroperoxy- $\alpha,\beta$ -  
unsaturated Epoxide to  $\gamma$ -Hydroxy- and  $\gamma$ -Oxo-alkenals Involves a  
Unique Pseudo Symmetrical Diepoxycabinyll Radical**

*Xiaodong Gu and Robert G. Salomon\**

Department of Chemistry, Case Western Reserve University, Cleveland, Ohio, 44106

[rgs@case.edu](mailto:rgs@case.edu)

## Contents

|                                                                                                 |     |
|-------------------------------------------------------------------------------------------------|-----|
| Title                                                                                           | S1  |
| Contents                                                                                        | S2  |
| <b>Fig. S1.</b> Derivatization of hexanal, ON, HNE and ONE with DNPH.                           | S3  |
| <b>Fig. S2.</b> Negative ion ESI-MS/MS spectrum of Hexanal-DNPH.                                | S4  |
| <b>Fig. S3.</b> Negative ion ESI-MS/MS spectrum of ON-DNPH.                                     | S4  |
| <b>Fig. S4.</b> Negative ion ESI-MS/MS spectrum of HNE-DNPH.                                    | S5  |
| <b>Fig. S5.</b> Negative ion ESI-MS/MS spectrum of ONE-DNPH.                                    | S5  |
| <b>Fig. S6.</b> Negative ion ESI-MS/MS spectrum of 13-HP-Epo-Acid ( <b>11</b> ).                | S6  |
| <b>Fig. S7.</b> Negative ESI-MS/MS spectrum of authentic HODA ( <b>13</b> ).                    | S6  |
| <b>Fig. S8.</b> Negative ion ESI-MS/MS spectrum of HODA methoxime.                              | S7  |
| <b>Fig. S9.</b> Negative ion ESI-MS/MS spectrum of KODA ( <b>14</b> ).                          | S7  |
| <b>Fig. S10.</b> Negative ion ESI-MS/MS spectrum of KODA methoxime.                             | S8  |
| <b>Fig. S11.</b> Negative ion ESI-MS/MS spectrum of benzaldehyde-DNPH.                          | S8  |
| <b>Fig. S12.</b> Calibration curve of HODA ( <b>13</b> ).                                       | S9  |
| <b>Fig. S13.</b> Calibration curve of KODA ( <b>14</b> ).                                       | S9  |
| <b>Fig. S14.</b> Calibration curve of Hexanal and ON ( <b>12</b> ) through DNPH derivatization. | S10 |
| <b>Fig. S15.</b> Calibration curve of HNE ( <b>9</b> ) through DNPH derivatization.             | S10 |
| <b>Fig. S16.</b> Calibration curve of ONE ( <b>9</b> ) through DNPH derivatization.             | S11 |

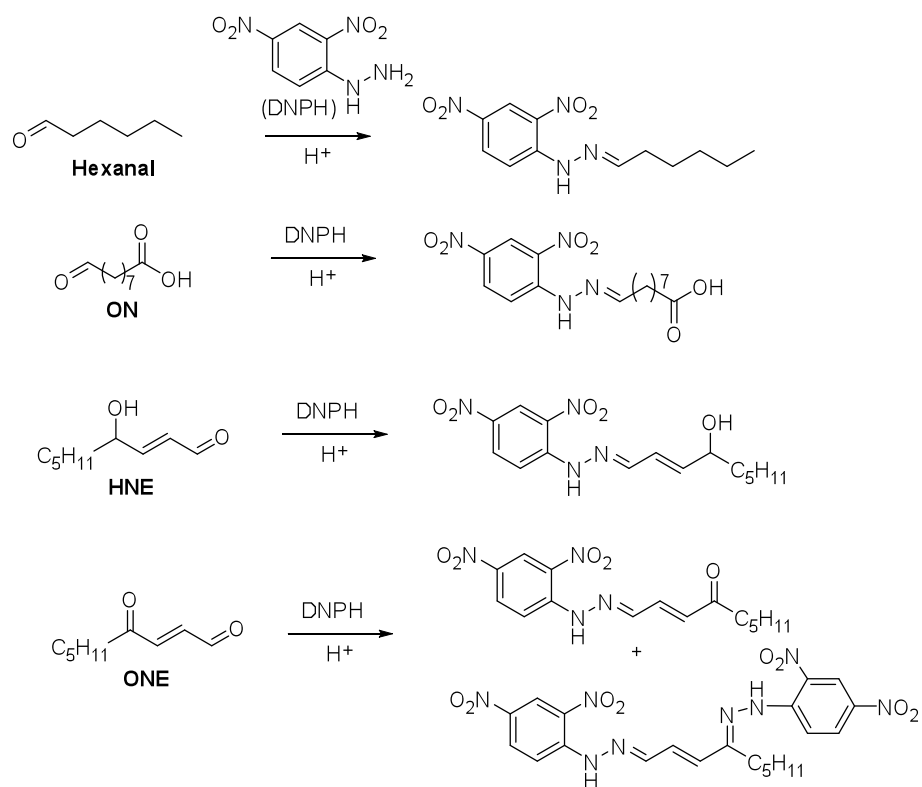

**Fig. S1.** Derivatization of hexanal, ON, HNE and ONE with DNPH.

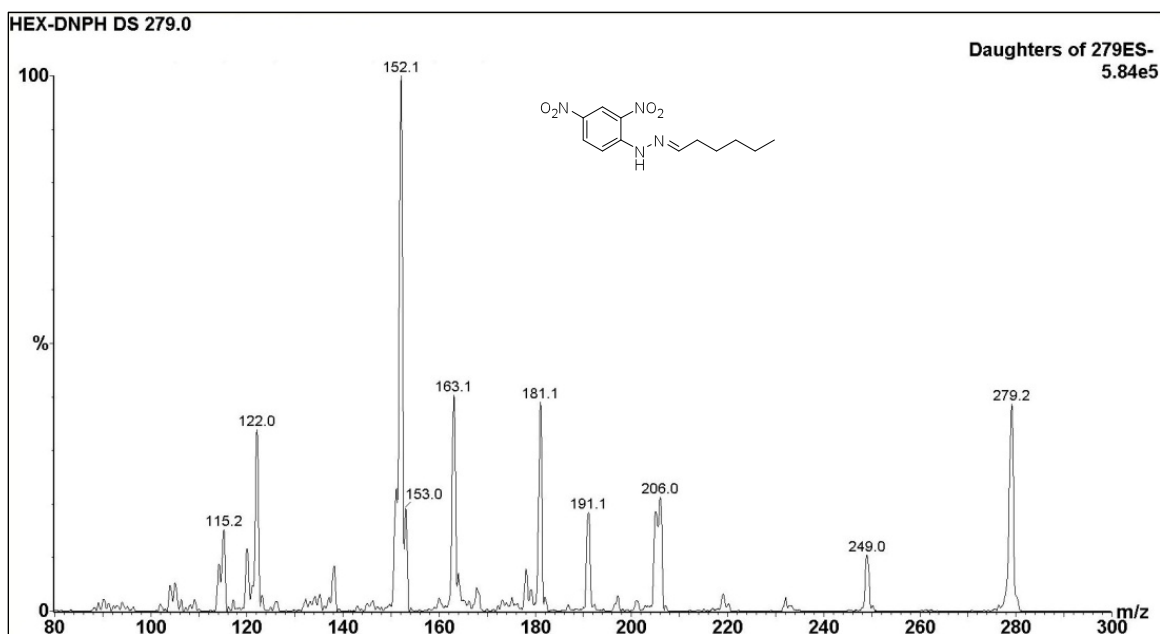

**Fig. S2.** Negative ion ESI-MS/MS spectrum of Hexanal-DNPH.

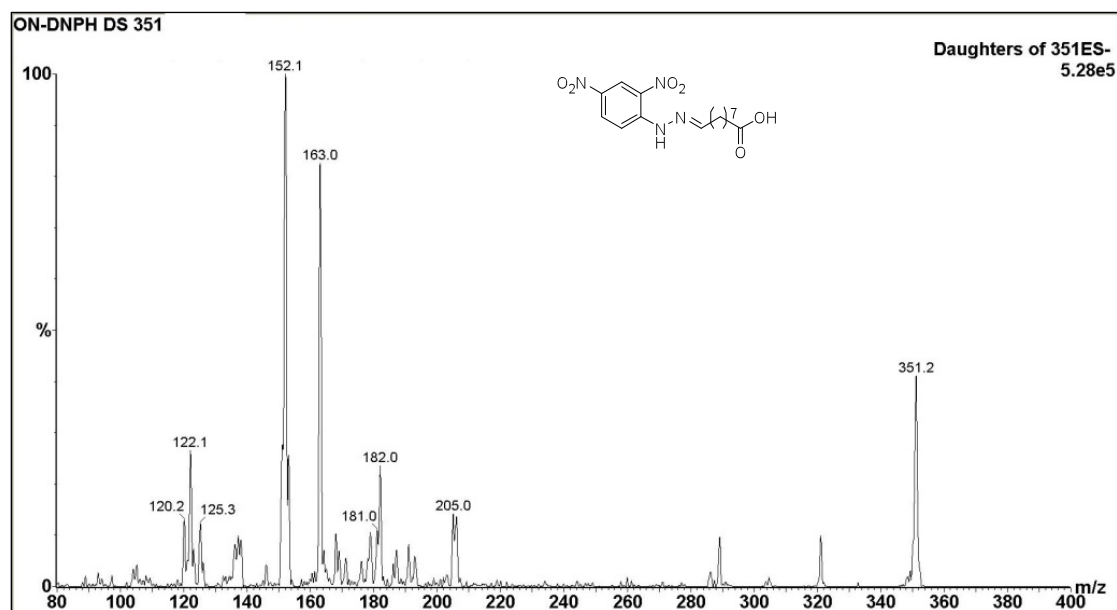

**Fig. S3.** Negative ion ESI-MS/MS spectrum of ON-DNPH.

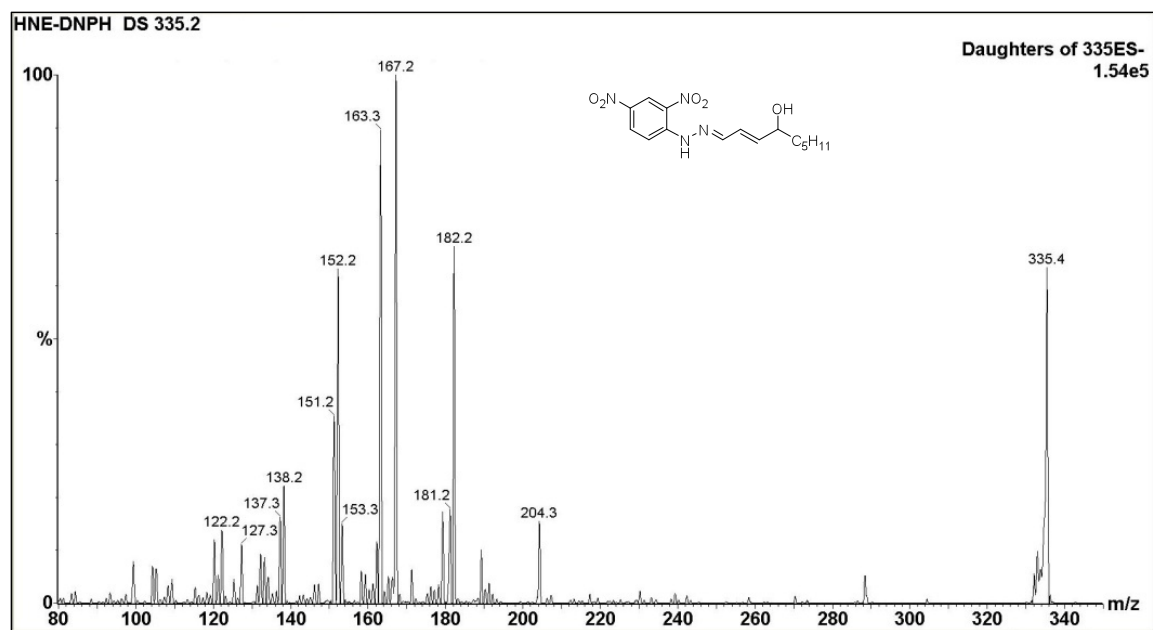

**Fig. S4.** Negative ion ESI-MS/MS spectrum of HNE-DNPH.

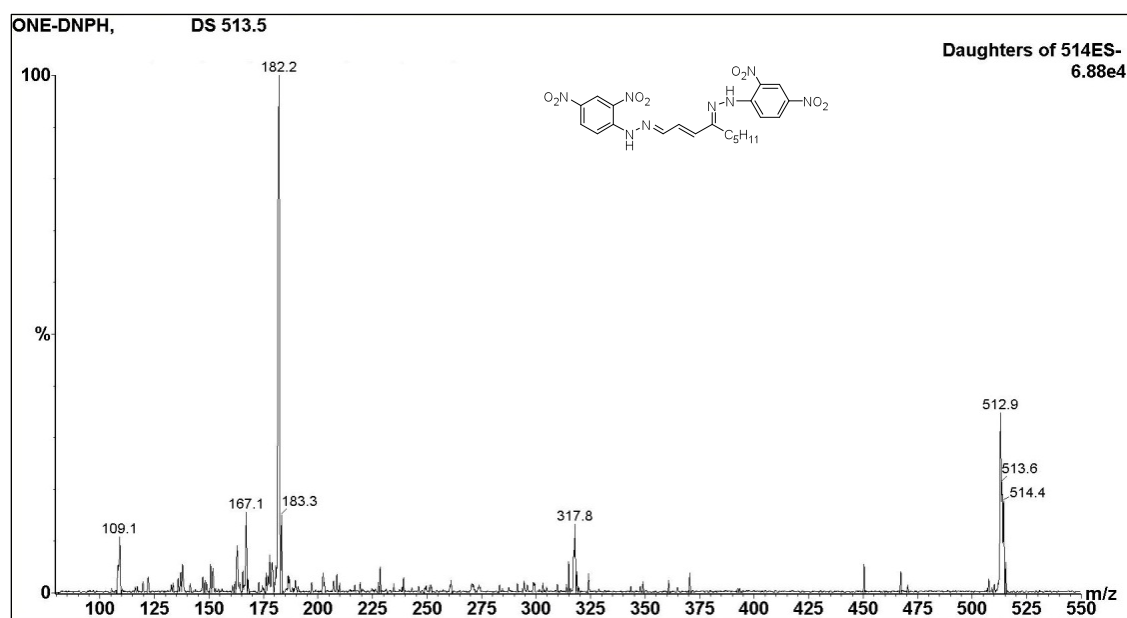

**Fig. S5.** Negative ion ESI-MS/MS spectrum of ONE-DNPH.

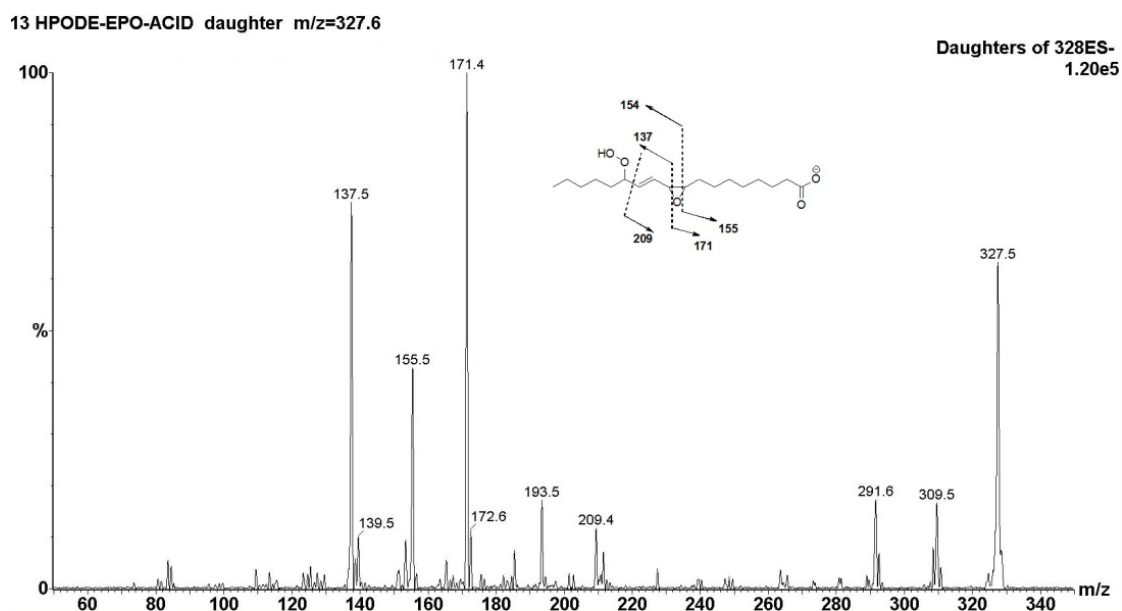

**Fig. S6.** Negative ion ESI-MS/MS spectrum of 13-HP-Epo-Acid (**11**).

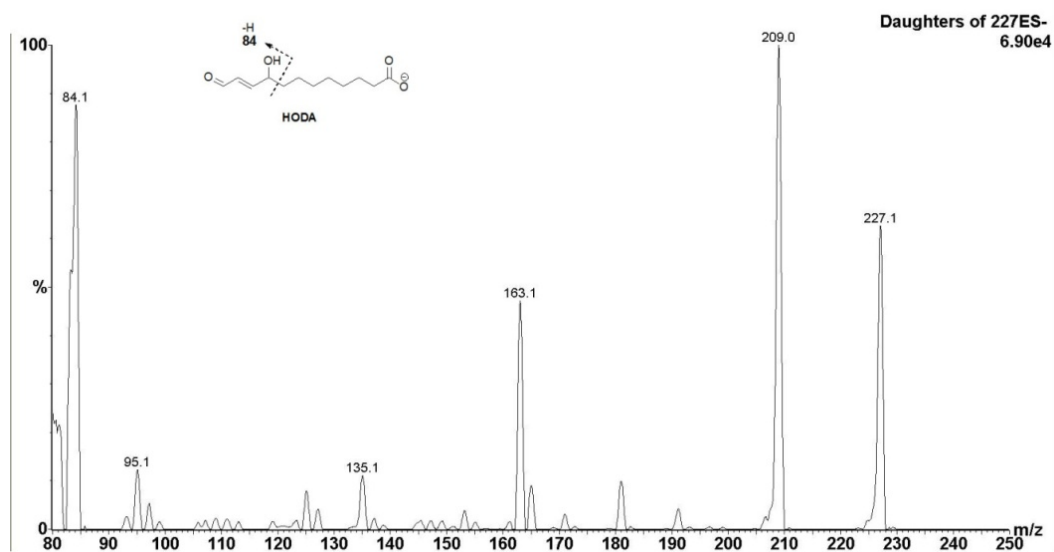

**Fig. S7.** Negative ESI-MS/MS spectrum of authentic HODA (**13**).

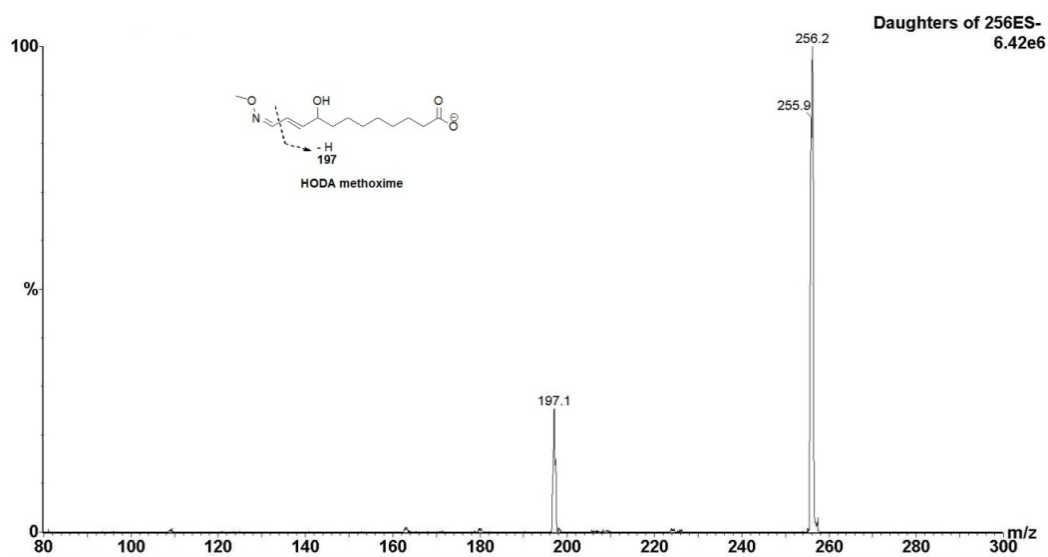

**Fig. S8.** Negative ion ESI-MS/MS spectrum of **HODA methoxime**.

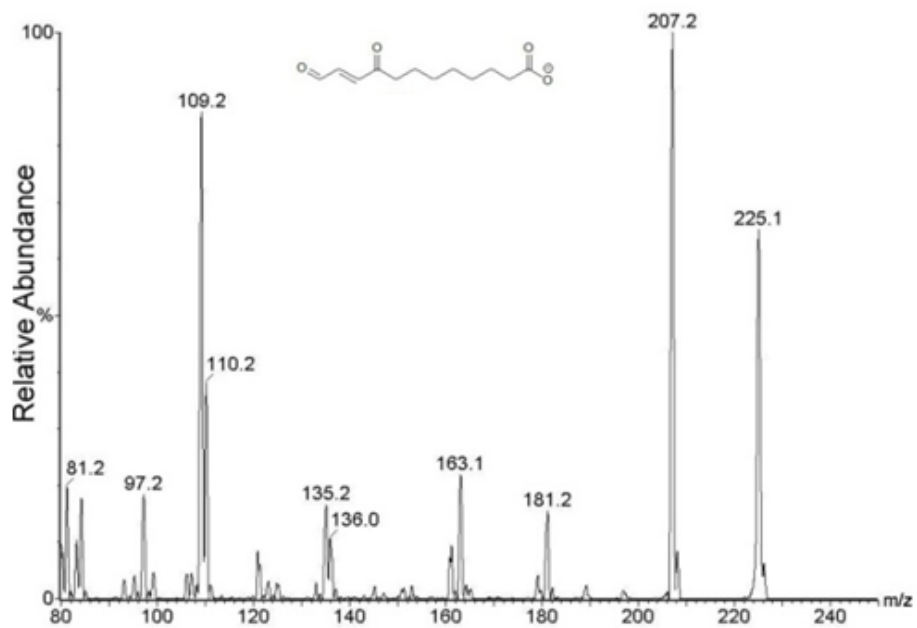

**Fig. S9.** Negative ion ESI-MS/MS spectrum of **KODA (14)**.

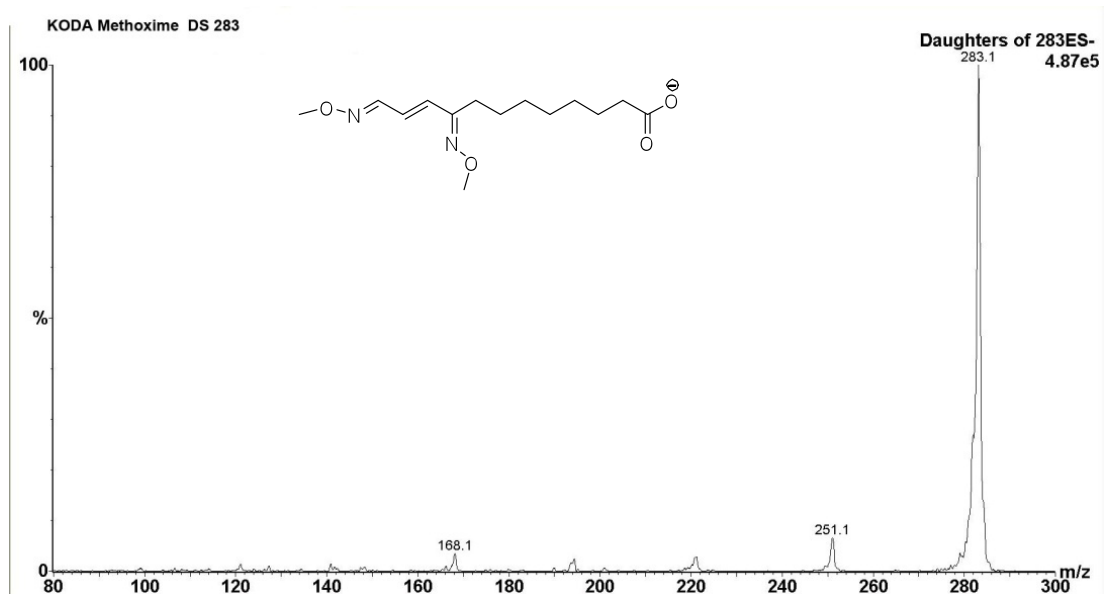

**Fig. S10.** Negative ion ESI-MS/MS spectrum of KODA methoxime.

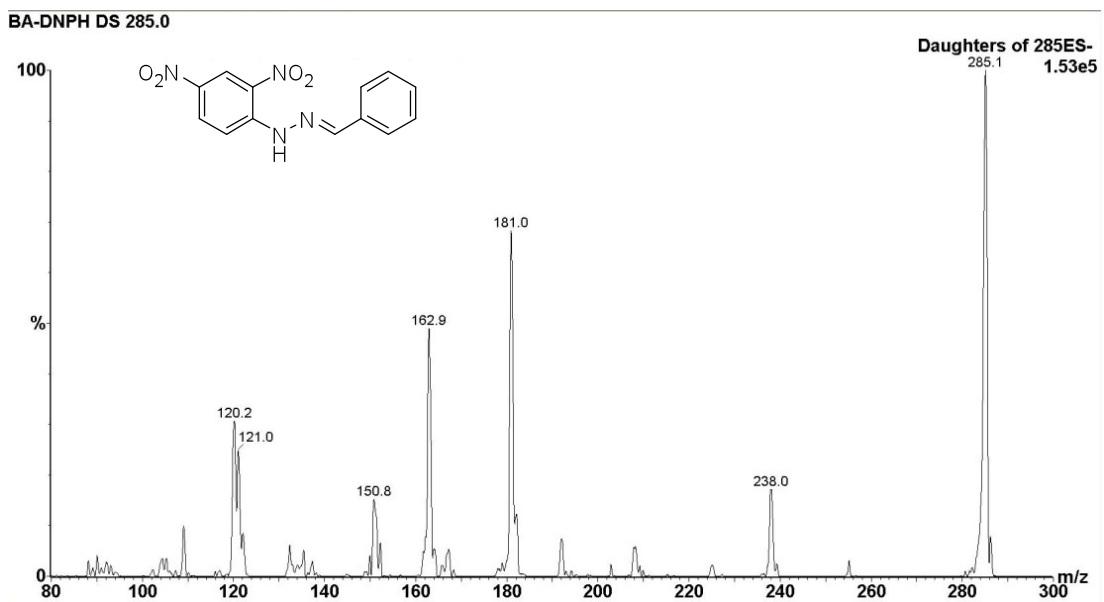

**Fig. S11.** Negative ion ESI-MS/MS spectrum of benzaldehyde-DNPH.



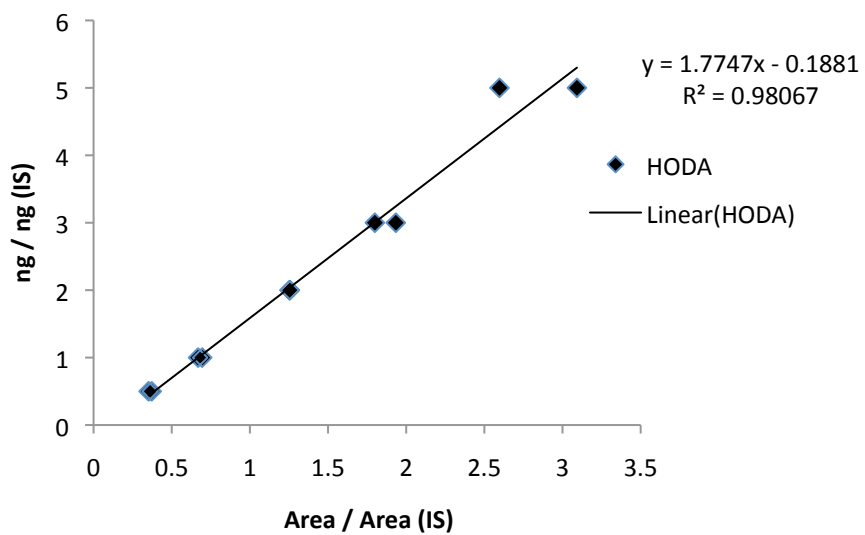

**Fig. S12.** Calibration curve of HODA (13).

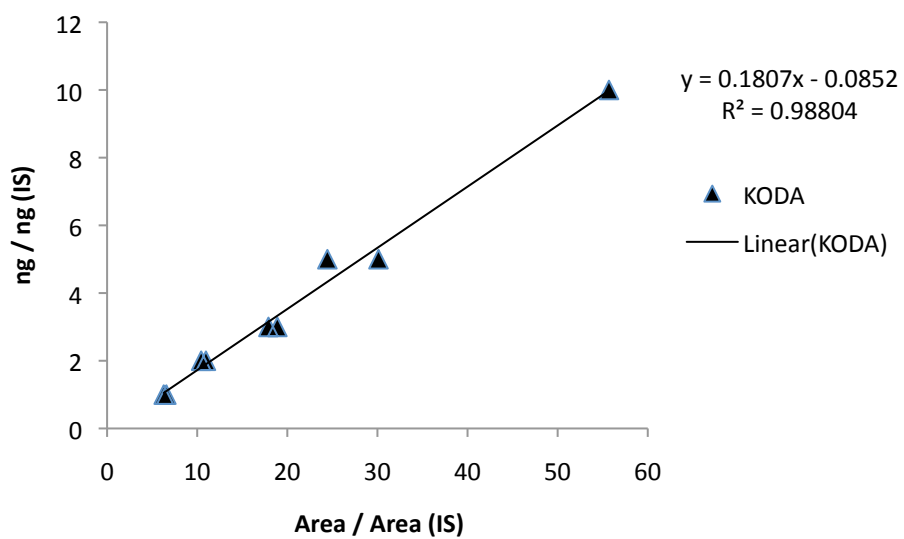

**Fig. S13.** Calibration curve of KODA (14).

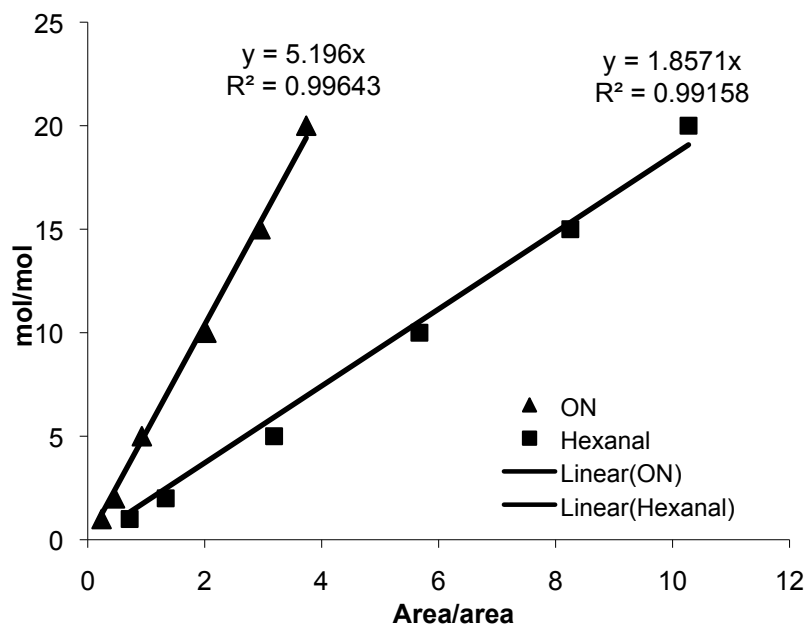

**Fig. S14.** Calibration curve of Hexanal and ON (12) through DNPH derivatization.

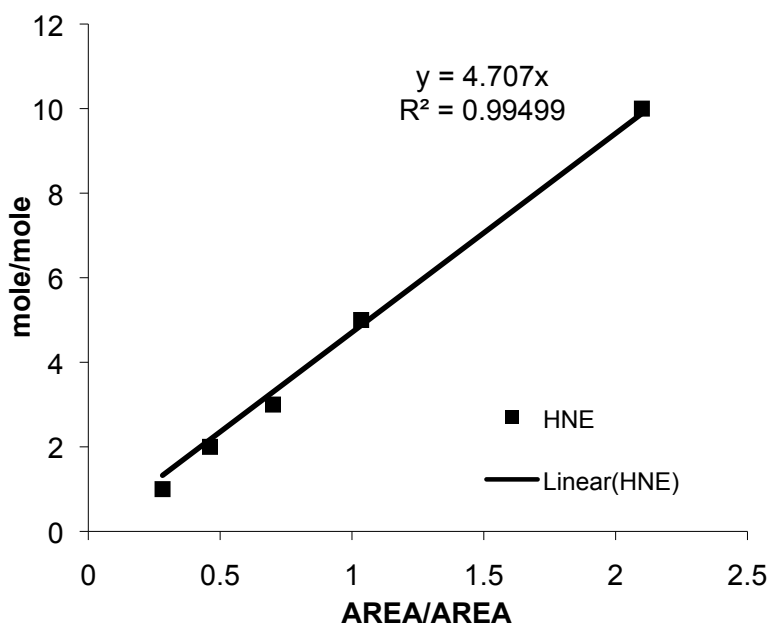

**Fig. S15.** Calibration curve of HNE (9) through DNPH derivatization.

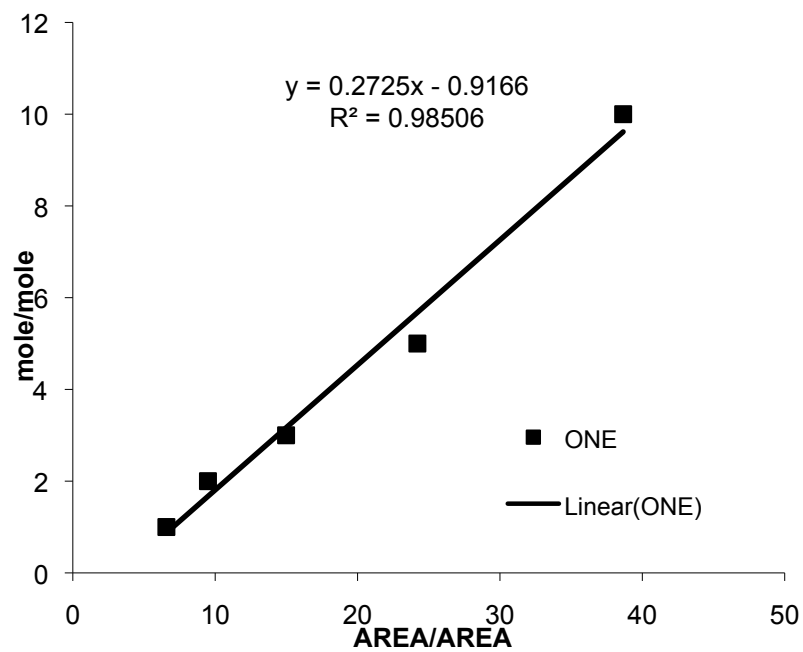

**Fig. S16.** Calibration curve of ONE (**10**) through DNPH derivatization.
